# Supplementary material for: Survey-derived best management practices for backyard beekeepers improve colony health and reduce mortality
Source: PLoS One. 2021 Jan 15;16(1):e0245490. doi: 10.1371/journal.pone.0245490 (PMC7810333; doi:10.1371/journal.pone.0245490)
Supplement: S2 Data — (XLSX) [file pone.0245490.s009.xlsx]

## Sheet: Sheet1
Colony Number	Beek	Apiary	BkCode	Year	Best/Average	Dead 4/1	Dead 5/1	Dead 10/31	Dead Next 4/1
B16-BAAA-B1	BAAA	BAAA	B16-BAAA-B	2016	Best	NA	0	0	1
B16-BAAA-B10	BAAA	BAAA	B16-BAAA-B	2016	Best	NA	0	0	0
B16-BAAA-B2	BAAA	BAAA	B16-BAAA-B	2016	Best	NA	0	0	0
B16-BAAA-B3	BAAA	BAAA	B16-BAAA-B	2016	Best	NA	0	0	0
B16-BAAA-B4	BAAA	BAAA	B16-BAAA-B	2016	Best	NA	0	0	0
B16-BAAA-B5	BAAA	BAAA	B16-BAAA-B	2016	Best	NA	0	0	0
B16-BAAA-B6	BAAA	BAAA	B16-BAAA-B	2016	Best	NA	0	0	0
B16-BAAA-B7	BAAA	BAAA	B16-BAAA-B	2016	Best	NA	0	0	1
B16-BAAA-B8	BAAA	BAAA	B16-BAAA-B	2016	Best	NA	0	0	1
B16-BAAA-B9	BAAA	BAAA	B16-BAAA-B	2016	Best	NA	0	0	0
B16-BAAA-C1	BAAA	BAAA	B16-BAAA-C	2016	Average	NA	0	0	0
B16-BAAA-C10	BAAA	BAAA	B16-BAAA-C	2016	Average	NA	0	0	1
B16-BAAA-C2	BAAA	BAAA	B16-BAAA-C	2016	Average	NA	0	0	0
B16-BAAA-C3	BAAA	BAAA	B16-BAAA-C	2016	Average	NA	0	0	0
B16-BAAA-C4	BAAA	BAAA	B16-BAAA-C	2016	Average	NA	0	0	0
B16-BAAA-C5	BAAA	BAAA	B16-BAAA-C	2016	Average	NA	0	0	0
B16-BAAA-C6	BAAA	BAAA	B16-BAAA-C	2016	Average	NA	0	0	1
B16-BAAA-C7	BAAA	BAAA	B16-BAAA-C	2016	Average	NA	0	0	0
B16-BAAA-C8	BAAA	BAAA	B16-BAAA-C	2016	Average	NA	0	0	0
B16-BAAA-C9	BAAA	BAAA	B16-BAAA-C	2016	Average	NA	0	0	0
B16-BAAB-A1	BAAB	BAAB	B16-BAAB-A	2016	Best	NA	0	0	1
B16-BAAB-A10	BAAB	BAAB	B16-BAAB-A	2016	Best	NA	0	0	1
B16-BAAB-A2	BAAB	BAAB	B16-BAAB-A	2016	Best	NA	0	0	1
B16-BAAB-A3	BAAB	BAAB	B16-BAAB-A	2016	Best	NA	0	0	1
B16-BAAB-A4	BAAB	BAAB	B16-BAAB-A	2016	Best	NA	0	0	1
B16-BAAB-A5	BAAB	BAAB	B16-BAAB-A	2016	Best	NA	0	0	1
B16-BAAB-A6	BAAB	BAAB	B16-BAAB-A	2016	Best	NA	0	0	1
B16-BAAB-A7	BAAB	BAAB	B16-BAAB-A	2016	Best	NA	0	0	1
B16-BAAB-A8	BAAB	BAAB	B16-BAAB-A	2016	Best	NA	0	0	1
B16-BAAB-A9	BAAB	BAAB	B16-BAAB-A	2016	Best	NA	0	0	1
B16-BAAB-B1	BAAB	BAAB	B16-BAAB-B	2016	Average	NA	0	1	1
B16-BAAB-B10	BAAB	BAAB	B16-BAAB-B	2016	Average	NA	0	0	1
B16-BAAB-B2	BAAB	BAAB	B16-BAAB-B	2016	Average	NA	0	1	1
B16-BAAB-B3	BAAB	BAAB	B16-BAAB-B	2016	Average	NA	0	0	1
B16-BAAB-B4	BAAB	BAAB	B16-BAAB-B	2016	Average	NA	0	1	1
B16-BAAB-B5	BAAB	BAAB	B16-BAAB-B	2016	Average	NA	0	0	1
B16-BAAB-B6	BAAB	BAAB	B16-BAAB-B	2016	Average	NA	0	0	1
B16-BAAB-B7	BAAB	BAAB	B16-BAAB-B	2016	Average	NA	0	1	1
B16-BAAB-B8	BAAB	BAAB	B16-BAAB-B	2016	Average	NA	0	0	1
B16-BAAB-B9	BAAB	BAAB	B16-BAAB-B	2016	Average	NA	0	0	1
B16-BAAC-A1	BAAC	BAAC	B16-BAAC-A	2016	Best	NA	0	0	0
B16-BAAC-A10	BAAC	BAAC	B16-BAAC-A	2016	Best	NA	0	0	0
B16-BAAC-A2	BAAC	BAAC	B16-BAAC-A	2016	Best	NA	0	0	1
B16-BAAC-A3	BAAC	BAAC	B16-BAAC-A	2016	Best	NA	0	0	0
B16-BAAC-A4	BAAC	BAAC	B16-BAAC-A	2016	Best	NA	0	1	1
B16-BAAC-A5	BAAC	BAAC	B16-BAAC-A	2016	Best	NA	0	0	0
B16-BAAC-A6	BAAC	BAAC	B16-BAAC-A	2016	Best	NA	0	0	0
B16-BAAC-A7	BAAC	BAAC	B16-BAAC-A	2016	Best	NA	0	0	0
B16-BAAC-A8	BAAC	BAAC	B16-BAAC-A	2016	Best	NA	0	0	0
B16-BAAC-A9	BAAC	BAAC	B16-BAAC-A	2016	Best	NA	0	0	0
B16-BAAC-B1	BAAC	BAAC	B16-BAAC-B	2016	Average	NA	0	0	0
B16-BAAC-B10	BAAC	BAAC	B16-BAAC-B	2016	Average	NA	0	0	0
B16-BAAC-B2	BAAC	BAAC	B16-BAAC-B	2016	Average	NA	0	0	0
B16-BAAC-B3	BAAC	BAAC	B16-BAAC-B	2016	Average	NA	0	0	0
B16-BAAC-B4	BAAC	BAAC	B16-BAAC-B	2016	Average	NA	0	1	1
B16-BAAC-B5	BAAC	BAAC	B16-BAAC-B	2016	Average	NA	0	0	0
B16-BAAC-B6	BAAC	BAAC	B16-BAAC-B	2016	Average	NA	0	0	1
B16-BAAC-B7	BAAC	BAAC	B16-BAAC-B	2016	Average	NA	0	0	0
B16-BAAC-B8	BAAC	BAAC	B16-BAAC-B	2016	Average	NA	0	0	0
B16-BAAC-B9	BAAC	BAAC	B16-BAAC-B	2016	Average	NA	0	0	1
B16-BAAD-A1	BAAD	BAAD	B16-BAAD-A	2016	Best	NA	0	0	0
B16-BAAD-A10	BAAD	BAAD	B16-BAAD-A	2016	Best	NA	NA	NA	NA
B16-BAAD-A2	BAAD	BAAD	B16-BAAD-A	2016	Best	NA	0	0	0
B16-BAAD-A3	BAAD	BAAD	B16-BAAD-A	2016	Best	NA	0	0	1
B16-BAAD-A4	BAAD	BAAD	B16-BAAD-A	2016	Best	NA	0	0	0
B16-BAAD-A5	BAAD	BAAD	B16-BAAD-A	2016	Best	NA	0	0	0
B16-BAAD-A6	BAAD	BAAD	B16-BAAD-A	2016	Best	NA	0	0	0
B16-BAAD-A7	BAAD	BAAD	B16-BAAD-A	2016	Best	NA	0	0	0
B16-BAAD-A8	BAAD	BAAD	B16-BAAD-A	2016	Best	NA	0	0	0
B16-BAAD-A9	BAAD	BAAD	B16-BAAD-A	2016	Best	NA	NA	NA	NA
B16-BAAD-B1	BAAD	BAAD	B16-BAAD-B	2016	Average	NA	0	1	1
B16-BAAD-B10	BAAD	BAAD	B16-BAAD-B	2016	Average	NA	NA	NA	NA
B16-BAAD-B2	BAAD	BAAD	B16-BAAD-B	2016	Average	NA	0	0	0
B16-BAAD-B3	BAAD	BAAD	B16-BAAD-B	2016	Average	NA	0	0	0
B16-BAAD-B4	BAAD	BAAD	B16-BAAD-B	2016	Average	NA	0	0	1
B16-BAAD-B5	BAAD	BAAD	B16-BAAD-B	2016	Average	NA	0	0	0
B16-BAAD-B6	BAAD	BAAD	B16-BAAD-B	2016	Average	NA	0	0	0
B16-BAAD-B7	BAAD	BAAD	B16-BAAD-B	2016	Average	NA	0	0	0
B16-BAAD-B8	BAAD	BAAD	B16-BAAD-B	2016	Average	NA	0	0	0
B16-BAAD-B9	BAAD	BAAD	B16-BAAD-B	2016	Average	NA	0	0	0
B16-BAAE-A1	BAAE	BAAE-AB	B16-BAAE-A	2016	Average	NA	0	0	1
B16-BAAE-A10	BAAE	BAAE-AB	B16-BAAE-A	2016	Average	NA	0	0	1
B16-BAAE-A2	BAAE	BAAE-AB	B16-BAAE-A	2016	Average	NA	0	1	1
B16-BAAE-A3	BAAE	BAAE-AB	B16-BAAE-A	2016	Average	NA	0	1	1
B16-BAAE-A4	BAAE	BAAE-AB	B16-BAAE-A	2016	Average	NA	0	0	1
B16-BAAE-A5	BAAE	BAAE-AB	B16-BAAE-A	2016	Average	NA	0	0	1
B16-BAAE-A6	BAAE	BAAE-AB	B16-BAAE-A	2016	Average	NA	0	0	1
B16-BAAE-A7	BAAE	BAAE-AB	B16-BAAE-A	2016	Average	NA	0	0	1
B16-BAAE-A8	BAAE	BAAE-AB	B16-BAAE-A	2016	Average	NA	0	0	1
B16-BAAE-A9	BAAE	BAAE-AB	B16-BAAE-A	2016	Average	NA	0	1	1
B16-BAAE-B1	BAAE	BAAE-AB	B16-BAAE-B	2016	Best	NA	0	0	0
B16-BAAE-B10	BAAE	BAAE-AB	B16-BAAE-B	2016	Best	NA	0	0	1
B16-BAAE-B2	BAAE	BAAE-AB	B16-BAAE-B	2016	Best	NA	0	0	0
B16-BAAE-B3	BAAE	BAAE-AB	B16-BAAE-B	2016	Best	NA	0	0	1
B16-BAAE-B4	BAAE	BAAE-AB	B16-BAAE-B	2016	Best	NA	0	0	1
B16-BAAE-B5	BAAE	BAAE-AB	B16-BAAE-B	2016	Best	NA	0	0	1
B16-BAAE-B6	BAAE	BAAE-AB	B16-BAAE-B	2016	Best	NA	0	1	1
B16-BAAE-B7	BAAE	BAAE-AB	B16-BAAE-B	2016	Best	NA	0	0	1
B16-BAAE-B8	BAAE	BAAE-AB	B16-BAAE-B	2016	Best	NA	0	0	0
B16-BAAE-B9	BAAE	BAAE-AB	B16-BAAE-B	2016	Best	NA	0	1	1
B16-BAAE-C1	BAAE	BAAE-CD	B16-BAAE-C	2016	Average	NA	0	1	1
B16-BAAE-C10	BAAE	BAAE-CD	B16-BAAE-C	2016	Average	NA	0	0	1
B16-BAAE-C2	BAAE	BAAE-CD	B16-BAAE-C	2016	Average	NA	0	1	1
B16-BAAE-C3	BAAE	BAAE-CD	B16-BAAE-C	2016	Average	NA	0	1	1
B16-BAAE-C4	BAAE	BAAE-CD	B16-BAAE-C	2016	Average	NA	0	0	1
B16-BAAE-C5	BAAE	BAAE-CD	B16-BAAE-C	2016	Average	NA	0	1	1
B16-BAAE-C6	BAAE	BAAE-CD	B16-BAAE-C	2016	Average	NA	0	1	1
B16-BAAE-C7	BAAE	BAAE-CD	B16-BAAE-C	2016	Average	NA	0	1	1
B16-BAAE-C8	BAAE	BAAE-CD	B16-BAAE-C	2016	Average	NA	0	1	1
B16-BAAE-C9	BAAE	BAAE-CD	B16-BAAE-C	2016	Average	NA	0	1	1
B16-BAAE-D1	BAAE	BAAE-CD	B16-BAAE-D	2016	Best	NA	0	0	0
B16-BAAE-D10	BAAE	BAAE-CD	B16-BAAE-D	2016	Best	NA	0	1	1
B16-BAAE-D2	BAAE	BAAE-CD	B16-BAAE-D	2016	Best	NA	0	0	0
B16-BAAE-D3	BAAE	BAAE-CD	B16-BAAE-D	2016	Best	NA	0	0	1
B16-BAAE-D4	BAAE	BAAE-CD	B16-BAAE-D	2016	Best	NA	0	0	0
B16-BAAE-D5	BAAE	BAAE-CD	B16-BAAE-D	2016	Best	NA	0	1	1
B16-BAAE-D6	BAAE	BAAE-CD	B16-BAAE-D	2016	Best	NA	0	0	1
B16-BAAE-D7	BAAE	BAAE-CD	B16-BAAE-D	2016	Best	NA	0	0	1
B16-BAAE-D8	BAAE	BAAE-CD	B16-BAAE-D	2016	Best	NA	0	1	1
B16-BAAE-D9	BAAE	BAAE-CD	B16-BAAE-D	2016	Best	NA	0	0	1
B16-BAAE-E1	BAAE	BAAE-EF	B16-BAAE-E	2016	Average	NA	0	0	1
B16-BAAE-E10	BAAE	BAAE-EF	B16-BAAE-E	2016	Average	NA	0	0	1
B16-BAAE-E2	BAAE	BAAE-EF	B16-BAAE-E	2016	Average	NA	0	0	1
B16-BAAE-E3	BAAE	BAAE-EF	B16-BAAE-E	2016	Average	NA	0	0	1
B16-BAAE-E4	BAAE	BAAE-EF	B16-BAAE-E	2016	Average	NA	0	1	1
B16-BAAE-E5	BAAE	BAAE-EF	B16-BAAE-E	2016	Average	NA	0	1	1
B16-BAAE-E6	BAAE	BAAE-EF	B16-BAAE-E	2016	Average	NA	0	0	1
B16-BAAE-E7	BAAE	BAAE-EF	B16-BAAE-E	2016	Average	NA	0	1	1
B16-BAAE-E8	BAAE	BAAE-EF	B16-BAAE-E	2016	Average	NA	0	1	1
B16-BAAE-E9	BAAE	BAAE-EF	B16-BAAE-E	2016	Average	NA	0	1	1
B16-BAAE-F1	BAAE	BAAE-EF	B16-BAAE-F	2016	Best	NA	0	1	1
B16-BAAE-F10	BAAE	BAAE-EF	B16-BAAE-F	2016	Best	NA	0	1	1
B16-BAAE-F2	BAAE	BAAE-EF	B16-BAAE-F	2016	Best	NA	0	1	1
B16-BAAE-F3	BAAE	BAAE-EF	B16-BAAE-F	2016	Best	NA	0	0	1
B16-BAAE-F4	BAAE	BAAE-EF	B16-BAAE-F	2016	Best	NA	0	1	1
B16-BAAE-F5	BAAE	BAAE-EF	B16-BAAE-F	2016	Best	NA	0	1	1
B16-BAAE-F6	BAAE	BAAE-EF	B16-BAAE-F	2016	Best	NA	0	1	1
B16-BAAE-F7	BAAE	BAAE-EF	B16-BAAE-F	2016	Best	NA	0	1	1
B16-BAAE-F8	BAAE	BAAE-EF	B16-BAAE-F	2016	Best	NA	0	1	1
B16-BAAE-F9	BAAE	BAAE-EF	B16-BAAE-F	2016	Best	NA	0	1	1
B17-BAAA-B1	BAAA	BAAA	B17-BAAA-B	2017	Best	1	0	0	1
B17-BAAA-B10	BAAA	BAAA	B17-BAAA-B	2017	Best	0	0	1	1
B17-BAAA-B2	BAAA	BAAA	B17-BAAA-B	2017	Best	0	0	0	1
B17-BAAA-B3	BAAA	BAAA	B17-BAAA-B	2017	Best	0	0	0	1
B17-BAAA-B4	BAAA	BAAA	B17-BAAA-B	2017	Best	0	0	0	1
B17-BAAA-B5	BAAA	BAAA	B17-BAAA-B	2017	Best	0	0	0	1
B17-BAAA-B6	BAAA	BAAA	B17-BAAA-B	2017	Best	0	0	0	1
B17-BAAA-B7	BAAA	BAAA	B17-BAAA-B	2017	Best	1	0	0	1
B17-BAAA-B8	BAAA	BAAA	B17-BAAA-B	2017	Best	1	0	0	1
B17-BAAA-B9	BAAA	BAAA	B17-BAAA-B	2017	Best	0	0	0	0
B17-BAAA-C1	BAAA	BAAA	B17-BAAA-C	2017	Average	0	0	0	1
B17-BAAA-C10	BAAA	BAAA	B17-BAAA-C	2017	Average	1	0	0	1
B17-BAAA-C2	BAAA	BAAA	B17-BAAA-C	2017	Average	0	0	0	1
B17-BAAA-C3	BAAA	BAAA	B17-BAAA-C	2017	Average	0	0	0	1
B17-BAAA-C4	BAAA	BAAA	B17-BAAA-C	2017	Average	0	0	0	1
B17-BAAA-C5	BAAA	BAAA	B17-BAAA-C	2017	Average	0	0	0	1
B17-BAAA-C6	BAAA	BAAA	B17-BAAA-C	2017	Average	1	0	0	1
B17-BAAA-C7	BAAA	BAAA	B17-BAAA-C	2017	Average	0	0	0	1
B17-BAAA-C8	BAAA	BAAA	B17-BAAA-C	2017	Average	0	0	0	1
B17-BAAA-C9	BAAA	BAAA	B17-BAAA-C	2017	Average	0	0	1	1
B17-BAAB-A1	BAAB	BAAB	B17-BAAB-A	2017	Best	1	0	0	0
B17-BAAB-A10	BAAB	BAAB	B17-BAAB-A	2017	Best	1	0	0	0
B17-BAAB-A2	BAAB	BAAB	B17-BAAB-A	2017	Best	1	0	0	0
B17-BAAB-A3	BAAB	BAAB	B17-BAAB-A	2017	Best	1	0	0	1
B17-BAAB-A4	BAAB	BAAB	B17-BAAB-A	2017	Best	1	0	0	0
B17-BAAB-A5	BAAB	BAAB	B17-BAAB-A	2017	Best	1	0	1	1
B17-BAAB-A6	BAAB	BAAB	B17-BAAB-A	2017	Best	1	0	0	0
B17-BAAB-A7	BAAB	BAAB	B17-BAAB-A	2017	Best	1	0	0	0
B17-BAAB-A8	BAAB	BAAB	B17-BAAB-A	2017	Best	1	0	0	0
B17-BAAB-A9	BAAB	BAAB	B17-BAAB-A	2017	Best	1	0	0	0
B17-BAAB-B1	BAAB	BAAB	B17-BAAB-B	2017	Average	1	0	0	0
B17-BAAB-B10	BAAB	BAAB	B17-BAAB-B	2017	Average	1	0	0	0
B17-BAAB-B2	BAAB	BAAB	B17-BAAB-B	2017	Average	1	0	0	0
B17-BAAB-B3	BAAB	BAAB	B17-BAAB-B	2017	Average	1	0	0	0
B17-BAAB-B4	BAAB	BAAB	B17-BAAB-B	2017	Average	1	0	0	0
B17-BAAB-B5	BAAB	BAAB	B17-BAAB-B	2017	Average	1	0	0	0
B17-BAAB-B6	BAAB	BAAB	B17-BAAB-B	2017	Average	1	0	0	0
B17-BAAB-B7	BAAB	BAAB	B17-BAAB-B	2017	Average	1	0	0	0
B17-BAAB-B8	BAAB	BAAB	B17-BAAB-B	2017	Average	1	0	0	0
B17-BAAB-B9	BAAB	BAAB	B17-BAAB-B	2017	Average	1	0	0	0
B17-BAAC-A1	BAAC	BAAC	B17-BAAC-A	2017	Best	0	0	0	1
B17-BAAC-A10	BAAC	BAAC	B17-BAAC-A	2017	Best	0	0	0	0
B17-BAAC-A2	BAAC	BAAC	B17-BAAC-A	2017	Best	1	0	0	1
B17-BAAC-A3	BAAC	BAAC	B17-BAAC-A	2017	Best	0	0	0	1
B17-BAAC-A4	BAAC	BAAC	B17-BAAC-A	2017	Best	1	0	0	0
B17-BAAC-A5	BAAC	BAAC	B17-BAAC-A	2017	Best	0	0	0	0
B17-BAAC-A6	BAAC	BAAC	B17-BAAC-A	2017	Best	0	0	0	1
B17-BAAC-A7	BAAC	BAAC	B17-BAAC-A	2017	Best	0	0	0	1
B17-BAAC-A8	BAAC	BAAC	B17-BAAC-A	2017	Best	0	0	0	1
B17-BAAC-A9	BAAC	BAAC	B17-BAAC-A	2017	Best	0	0	0	0
B17-BAAC-B1	BAAC	BAAC	B17-BAAC-B	2017	Average	0	0	0	0
B17-BAAC-B10	BAAC	BAAC	B17-BAAC-B	2017	Average	0	0	0	0
B17-BAAC-B2	BAAC	BAAC	B17-BAAC-B	2017	Average	0	0	0	1
B17-BAAC-B3	BAAC	BAAC	B17-BAAC-B	2017	Average	0	0	1	1
B17-BAAC-B4	BAAC	BAAC	B17-BAAC-B	2017	Average	1	0	1	1
B17-BAAC-B5	BAAC	BAAC	B17-BAAC-B	2017	Average	0	0	0	1
B17-BAAC-B6	BAAC	BAAC	B17-BAAC-B	2017	Average	1	0	1	1
B17-BAAC-B7	BAAC	BAAC	B17-BAAC-B	2017	Average	0	0	0	1
B17-BAAC-B8	BAAC	BAAC	B17-BAAC-B	2017	Average	0	0	0	1
B17-BAAC-B9	BAAC	BAAC	B17-BAAC-B	2017	Average	1	0	0	1
B17-BAAD-A1	BAAD	BAAD	B17-BAAD-A	2017	Average	0	0	0	0
B17-BAAD-A10	BAAD	BAAD	B17-BAAD-A	2017	Average	NA	0	0	0
B17-BAAD-A2	BAAD	BAAD	B17-BAAD-A	2017	Average	0	0	0	1
B17-BAAD-A3	BAAD	BAAD	B17-BAAD-A	2017	Average	1	0	0	0
B17-BAAD-A4	BAAD	BAAD	B17-BAAD-A	2017	Average	0	0	1	1
B17-BAAD-A5	BAAD	BAAD	B17-BAAD-A	2017	Average	0	0	0	0
B17-BAAD-A6	BAAD	BAAD	B17-BAAD-A	2017	Average	0	0	0	1
B17-BAAD-A7	BAAD	BAAD	B17-BAAD-A	2017	Average	0	0	0	1
B17-BAAD-A8	BAAD	BAAD	B17-BAAD-A	2017	Average	0	0	0	1
B17-BAAD-A9	BAAD	BAAD	B17-BAAD-A	2017	Average	NA	0	0	1
B17-BAAD-B1	BAAD	BAAD	B17-BAAD-B	2017	Best	1	0	0	0
B17-BAAD-B10	BAAD	BAAD	B17-BAAD-B	2017	Best	NA	0	0	1
B17-BAAD-B2	BAAD	BAAD	B17-BAAD-B	2017	Best	0	0	0	0
B17-BAAD-B3	BAAD	BAAD	B17-BAAD-B	2017	Best	0	0	0	0
B17-BAAD-B4	BAAD	BAAD	B17-BAAD-B	2017	Best	1	0	0	0
B17-BAAD-B5	BAAD	BAAD	B17-BAAD-B	2017	Best	0	0	0	0
B17-BAAD-B6	BAAD	BAAD	B17-BAAD-B	2017	Best	0	0	1	1
B17-BAAD-B7	BAAD	BAAD	B17-BAAD-B	2017	Best	0	0	0	0
B17-BAAD-B8	BAAD	BAAD	B17-BAAD-B	2017	Best	0	0	1	1
B17-BAAD-B9	BAAD	BAAD	B17-BAAD-B	2017	Best	0	0	1	1
B17-BAAE-A1	BAAE	BAAE-AB	B17-BAAE-A	2017	Average	1	0	0	0
B17-BAAE-A10	BAAE	BAAE-AB	B17-BAAE-A	2017	Average	1	0	0	0
B17-BAAE-A2	BAAE	BAAE-AB	B17-BAAE-A	2017	Average	1	0	0	0
B17-BAAE-A3	BAAE	BAAE-AB	B17-BAAE-A	2017	Average	1	0	0	0
B17-BAAE-A4	BAAE	BAAE-AB	B17-BAAE-A	2017	Average	1	0	0	1
B17-BAAE-A5	BAAE	BAAE-AB	B17-BAAE-A	2017	Average	1	0	0	1
B17-BAAE-A6	BAAE	BAAE-AB	B17-BAAE-A	2017	Average	1	0	0	1
B17-BAAE-A7	BAAE	BAAE-AB	B17-BAAE-A	2017	Average	1	0	0	1
B17-BAAE-A8	BAAE	BAAE-AB	B17-BAAE-A	2017	Average	1	0	1	1
B17-BAAE-A9	BAAE	BAAE-AB	B17-BAAE-A	2017	Average	1	0	0	1
B17-BAAE-B1	BAAE	BAAE-AB	B17-BAAE-B	2017	Best	0	0	0	0
B17-BAAE-B10	BAAE	BAAE-AB	B17-BAAE-B	2017	Best	1	0	0	0
B17-BAAE-B2	BAAE	BAAE-AB	B17-BAAE-B	2017	Best	0	0	0	1
B17-BAAE-B3	BAAE	BAAE-AB	B17-BAAE-B	2017	Best	1	0	0	1
B17-BAAE-B4	BAAE	BAAE-AB	B17-BAAE-B	2017	Best	1	0	0	0
B17-BAAE-B5	BAAE	BAAE-AB	B17-BAAE-B	2017	Best	1	0	1	1
B17-BAAE-B6	BAAE	BAAE-AB	B17-BAAE-B	2017	Best	1	0	0	1
B17-BAAE-B7	BAAE	BAAE-AB	B17-BAAE-B	2017	Best	1	0	0	0
B17-BAAE-B8	BAAE	BAAE-AB	B17-BAAE-B	2017	Best	0	0	0	1
B17-BAAE-B9	BAAE	BAAE-AB	B17-BAAE-B	2017	Best	1	0	0	0
B17-BAAE-C1	BAAE	BAAE-CD	B17-BAAE-C	2017	Average	1	0	0	0
B17-BAAE-C10	BAAE	BAAE-CD	B17-BAAE-C	2017	Average	1	0	0	0
B17-BAAE-C2	BAAE	BAAE-CD	B17-BAAE-C	2017	Average	1	0	1	1
B17-BAAE-C3	BAAE	BAAE-CD	B17-BAAE-C	2017	Average	1	0	0	1
B17-BAAE-C4	BAAE	BAAE-CD	B17-BAAE-C	2017	Average	1	0	0	1
B17-BAAE-C5	BAAE	BAAE-CD	B17-BAAE-C	2017	Average	1	0	0	1
B17-BAAE-C6	BAAE	BAAE-CD	B17-BAAE-C	2017	Average	1	0	1	1
B17-BAAE-C7	BAAE	BAAE-CD	B17-BAAE-C	2017	Average	1	0	0	1
B17-BAAE-C8	BAAE	BAAE-CD	B17-BAAE-C	2017	Average	1	0	0	1
B17-BAAE-C9	BAAE	BAAE-CD	B17-BAAE-C	2017	Average	1	0	0	1
B17-BAAE-D1	BAAE	BAAE-CD	B17-BAAE-D	2017	Best	0	0	0	0
B17-BAAE-D10	BAAE	BAAE-CD	B17-BAAE-D	2017	Best	1	0	0	0
B17-BAAE-D2	BAAE	BAAE-CD	B17-BAAE-D	2017	Best	0	0	1	1
B17-BAAE-D3	BAAE	BAAE-CD	B17-BAAE-D	2017	Best	1	0	0	0
B17-BAAE-D4	BAAE	BAAE-CD	B17-BAAE-D	2017	Best	0	0	0	0
B17-BAAE-D5	BAAE	BAAE-CD	B17-BAAE-D	2017	Best	1	0	1	1
B17-BAAE-D6	BAAE	BAAE-CD	B17-BAAE-D	2017	Best	1	0	0	1
B17-BAAE-D7	BAAE	BAAE-CD	B17-BAAE-D	2017	Best	1	0	0	1
B17-BAAE-D8	BAAE	BAAE-CD	B17-BAAE-D	2017	Best	1	0	0	0
B17-BAAE-D9	BAAE	BAAE-CD	B17-BAAE-D	2017	Best	1	0	0	0
B17-BAAE-E1	BAAE	BAAE-EF	B17-BAAE-E	2017	Average	1	0	0	1
B17-BAAE-E10	BAAE	BAAE-EF	B17-BAAE-E	2017	Average	1	0	0	0
B17-BAAE-E2	BAAE	BAAE-EF	B17-BAAE-E	2017	Average	1	0	0	0
B17-BAAE-E3	BAAE	BAAE-EF	B17-BAAE-E	2017	Average	1	0	0	0
B17-BAAE-E4	BAAE	BAAE-EF	B17-BAAE-E	2017	Average	1	0	0	0
B17-BAAE-E5	BAAE	BAAE-EF	B17-BAAE-E	2017	Average	1	0	0	1
B17-BAAE-E6	BAAE	BAAE-EF	B17-BAAE-E	2017	Average	1	0	1	1
B17-BAAE-E7	BAAE	BAAE-EF	B17-BAAE-E	2017	Average	1	0	0	0
B17-BAAE-E8	BAAE	BAAE-EF	B17-BAAE-E	2017	Average	1	0	1	1
B17-BAAE-E9	BAAE	BAAE-EF	B17-BAAE-E	2017	Average	1	0	0	1
B17-BAAE-F1	BAAE	BAAE-EF	B17-BAAE-F	2017	Best	1	0	0	1
B17-BAAE-F10	BAAE	BAAE-EF	B17-BAAE-F	2017	Best	1	0	0	0
B17-BAAE-F2	BAAE	BAAE-EF	B17-BAAE-F	2017	Best	1	0	0	0
B17-BAAE-F3	BAAE	BAAE-EF	B17-BAAE-F	2017	Best	1	0	0	0
B17-BAAE-F4	BAAE	BAAE-EF	B17-BAAE-F	2017	Best	1	0	1	1
B17-BAAE-F5	BAAE	BAAE-EF	B17-BAAE-F	2017	Best	1	0	0	0
B17-BAAE-F6	BAAE	BAAE-EF	B17-BAAE-F	2017	Best	1	0	0	0
B17-BAAE-F7	BAAE	BAAE-EF	B17-BAAE-F	2017	Best	1	0	0	0
B17-BAAE-F8	BAAE	BAAE-EF	B17-BAAE-F	2017	Best	1	0	0	0
B17-BAAE-F9	BAAE	BAAE-EF	B17-BAAE-F	2017	Best	1	0	0	0
B18-BAAB-A1	BAAB	BAAB	B18-BAAB-A	2018	Best	0	0	0	1
B18-BAAB-A10	BAAB	BAAB	B18-BAAB-A	2018	Best	0	0	0	0
B18-BAAB-A2	BAAB	BAAB	B18-BAAB-A	2018	Best	0	0	0	0
B18-BAAB-A3	BAAB	BAAB	B18-BAAB-A	2018	Best	1	0	0	1
B18-BAAB-A4	BAAB	BAAB	B18-BAAB-A	2018	Best	0	0	0	1
B18-BAAB-A5	BAAB	BAAB	B18-BAAB-A	2018	Best	1	0	0	0
B18-BAAB-A6	BAAB	BAAB	B18-BAAB-A	2018	Best	0	0	0	1
B18-BAAB-A7	BAAB	BAAB	B18-BAAB-A	2018	Best	0	0	0	0
B18-BAAB-A8	BAAB	BAAB	B18-BAAB-A	2018	Best	0	0	0	1
B18-BAAB-A9	BAAB	BAAB	B18-BAAB-A	2018	Best	0	0	0	0
B18-BAAB-B1	BAAB	BAAB	B18-BAAB-B	2018	Average	0	0	1	1
B18-BAAB-B10	BAAB	BAAB	B18-BAAB-B	2018	Average	0	0	0	1
B18-BAAB-B2	BAAB	BAAB	B18-BAAB-B	2018	Average	0	0	1	1
B18-BAAB-B3	BAAB	BAAB	B18-BAAB-B	2018	Average	0	0	0	1
B18-BAAB-B4	BAAB	BAAB	B18-BAAB-B	2018	Average	0	0	1	1
B18-BAAB-B5	BAAB	BAAB	B18-BAAB-B	2018	Average	0	0	0	1
B18-BAAB-B6	BAAB	BAAB	B18-BAAB-B	2018	Average	0	0	1	1
B18-BAAB-B7	BAAB	BAAB	B18-BAAB-B	2018	Average	0	0	0	1
B18-BAAB-B8	BAAB	BAAB	B18-BAAB-B	2018	Average	0	0	0	1
B18-BAAB-B9	BAAB	BAAB	B18-BAAB-B	2018	Average	0	0	0	1
B18-BAAC-A1	BAAC	BAAC	B18-BAAC-A	2018	Best	1	0	0	1
B18-BAAC-A10	BAAC	BAAC	B18-BAAC-A	2018	Best	0	0	0	1
B18-BAAC-A2	BAAC	BAAC	B18-BAAC-A	2018	Best	1	0	0	0
B18-BAAC-A3	BAAC	BAAC	B18-BAAC-A	2018	Best	1	0	0	0
B18-BAAC-A4	BAAC	BAAC	B18-BAAC-A	2018	Best	0	0	0	0
B18-BAAC-A5	BAAC	BAAC	B18-BAAC-A	2018	Best	0	0	0	1
B18-BAAC-A6	BAAC	BAAC	B18-BAAC-A	2018	Best	1	0	0	0
B18-BAAC-A7	BAAC	BAAC	B18-BAAC-A	2018	Best	1	0	0	0
B18-BAAC-A8	BAAC	BAAC	B18-BAAC-A	2018	Best	1	0	0	0
B18-BAAC-A9	BAAC	BAAC	B18-BAAC-A	2018	Best	0	0	0	0
B18-BAAC-B1	BAAC	BAAC	B18-BAAC-B	2018	Average	0	0	0	0
B18-BAAC-B10	BAAC	BAAC	B18-BAAC-B	2018	Average	0	0	0	1
B18-BAAC-B2	BAAC	BAAC	B18-BAAC-B	2018	Average	1	0	0	0
B18-BAAC-B3	BAAC	BAAC	B18-BAAC-B	2018	Average	1	0	0	0
B18-BAAC-B4	BAAC	BAAC	B18-BAAC-B	2018	Average	1	0	0	1
B18-BAAC-B5	BAAC	BAAC	B18-BAAC-B	2018	Average	1	0	0	1
B18-BAAC-B6	BAAC	BAAC	B18-BAAC-B	2018	Average	1	0	0	1
B18-BAAC-B7	BAAC	BAAC	B18-BAAC-B	2018	Average	1	0	0	1
B18-BAAC-B8	BAAC	BAAC	B18-BAAC-B	2018	Average	1	0	0	1
B18-BAAC-B9	BAAC	BAAC	B18-BAAC-B	2018	Average	1	0	0	1
B18-BAAD-A1	BAAD	BAAD	B18-BAAD-A	2018	Average	0	0	0	0
B18-BAAD-A10	BAAD	BAAD	B18-BAAD-A	2018	Average	0	0	0	1
B18-BAAD-A2	BAAD	BAAD	B18-BAAD-A	2018	Average	1	0	0	1
B18-BAAD-A3	BAAD	BAAD	B18-BAAD-A	2018	Average	0	0	0	1
B18-BAAD-A4	BAAD	BAAD	B18-BAAD-A	2018	Average	1	0	0	1
B18-BAAD-A5	BAAD	BAAD	B18-BAAD-A	2018	Average	0	0	0	1
B18-BAAD-A6	BAAD	BAAD	B18-BAAD-A	2018	Average	1	0	0	0
B18-BAAD-A7	BAAD	BAAD	B18-BAAD-A	2018	Average	1	0	0	1
B18-BAAD-A8	BAAD	BAAD	B18-BAAD-A	2018	Average	1	0	0	1
B18-BAAD-A9	BAAD	BAAD	B18-BAAD-A	2018	Average	1	0	0	1
B18-BAAD-B1	BAAD	BAAD	B18-BAAD-B	2018	Best	0	0	0	0
B18-BAAD-B10	BAAD	BAAD	B18-BAAD-B	2018	Best	1	0	0	0
B18-BAAD-B2	BAAD	BAAD	B18-BAAD-B	2018	Best	0	0	0	1
B18-BAAD-B3	BAAD	BAAD	B18-BAAD-B	2018	Best	0	0	0	0
B18-BAAD-B4	BAAD	BAAD	B18-BAAD-B	2018	Best	0	0	0	0
B18-BAAD-B5	BAAD	BAAD	B18-BAAD-B	2018	Best	0	0	0	1
B18-BAAD-B6	BAAD	BAAD	B18-BAAD-B	2018	Best	0	0	0	0
B18-BAAD-B7	BAAD	BAAD	B18-BAAD-B	2018	Best	0	0	0	1
B18-BAAD-B8	BAAD	BAAD	B18-BAAD-B	2018	Best	1	0	0	1
B18-BAAD-B9	BAAD	BAAD	B18-BAAD-B	2018	Best	1	0	1	1
B18-BAAE-A1	BAAE	BAAE-AB	B18-BAAE-A	2018	Average	0	0	0	0
B18-BAAE-A10	BAAE	BAAE-AB	B18-BAAE-A	2018	Average	0	0	0	0
B18-BAAE-A2	BAAE	BAAE-AB	B18-BAAE-A	2018	Average	0	0	0	0
B18-BAAE-A3	BAAE	BAAE-AB	B18-BAAE-A	2018	Average	0	0	0	0
B18-BAAE-A4	BAAE	BAAE-AB	B18-BAAE-A	2018	Average	1	0	0	1
B18-BAAE-A5	BAAE	BAAE-AB	B18-BAAE-A	2018	Average	1	0	0	1
B18-BAAE-A6	BAAE	BAAE-AB	B18-BAAE-A	2018	Average	1	0	1	1
B18-BAAE-A7	BAAE	BAAE-AB	B18-BAAE-A	2018	Average	1	0	0	1
B18-BAAE-A8	BAAE	BAAE-AB	B18-BAAE-A	2018	Average	1	0	0	1
B18-BAAE-A9	BAAE	BAAE-AB	B18-BAAE-A	2018	Average	1	0	0	1
B18-BAAE-B1	BAAE	BAAE-AB	B18-BAAE-B	2018	Best	0	0	0	0
B18-BAAE-B10	BAAE	BAAE-AB	B18-BAAE-B	2018	Best	0	0	0	0
B18-BAAE-B2	BAAE	BAAE-AB	B18-BAAE-B	2018	Best	1	0	0	0
B18-BAAE-B3	BAAE	BAAE-AB	B18-BAAE-B	2018	Best	1	0	0	1
B18-BAAE-B4	BAAE	BAAE-AB	B18-BAAE-B	2018	Best	0	0	0	0
B18-BAAE-B5	BAAE	BAAE-AB	B18-BAAE-B	2018	Best	1	0	1	1
B18-BAAE-B6	BAAE	BAAE-AB	B18-BAAE-B	2018	Best	1	0	1	1
B18-BAAE-B7	BAAE	BAAE-AB	B18-BAAE-B	2018	Best	0	0	0	0
B18-BAAE-B8	BAAE	BAAE-AB	B18-BAAE-B	2018	Best	1	0	1	1
B18-BAAE-B9	BAAE	BAAE-AB	B18-BAAE-B	2018	Best	0	0	0	0
B18-BAAE-C1	BAAE	BAAE-CD	B18-BAAE-C	2018	Average	0	0	0	0
B18-BAAE-C10	BAAE	BAAE-CD	B18-BAAE-C	2018	Average	0	0	0	1
B18-BAAE-C2	BAAE	BAAE-CD	B18-BAAE-C	2018	Average	1	0	0	1
B18-BAAE-C3	BAAE	BAAE-CD	B18-BAAE-C	2018	Average	1	0	0	1
B18-BAAE-C4	BAAE	BAAE-CD	B18-BAAE-C	2018	Average	1	0	0	0
B18-BAAE-C5	BAAE	BAAE-CD	B18-BAAE-C	2018	Average	1	0	0	0
B18-BAAE-C6	BAAE	BAAE-CD	B18-BAAE-C	2018	Average	1	0	0	0
B18-BAAE-C7	BAAE	BAAE-CD	B18-BAAE-C	2018	Average	1	0	0	0
B18-BAAE-C8	BAAE	BAAE-CD	B18-BAAE-C	2018	Average	1	0	0	0
B18-BAAE-C9	BAAE	BAAE-CD	B18-BAAE-C	2018	Average	1	0	0	1
B18-BAAE-D1	BAAE	BAAE-CD	B18-BAAE-D	2018	Best	0	0	0	0
B18-BAAE-D10	BAAE	BAAE-CD	B18-BAAE-D	2018	Best	0	0	0	0
B18-BAAE-D2	BAAE	BAAE-CD	B18-BAAE-D	2018	Best	1	0	0	0
B18-BAAE-D3	BAAE	BAAE-CD	B18-BAAE-D	2018	Best	0	0	0	0
B18-BAAE-D4	BAAE	BAAE-CD	B18-BAAE-D	2018	Best	0	0	0	0
B18-BAAE-D5	BAAE	BAAE-CD	B18-BAAE-D	2018	Best	1	0	0	0
B18-BAAE-D6	BAAE	BAAE-CD	B18-BAAE-D	2018	Best	1	0	0	0
B18-BAAE-D7	BAAE	BAAE-CD	B18-BAAE-D	2018	Best	1	0	0	0
B18-BAAE-D8	BAAE	BAAE-CD	B18-BAAE-D	2018	Best	0	0	0	0
B18-BAAE-D9	BAAE	BAAE-CD	B18-BAAE-D	2018	Best	0	0	1	1
B18-BAAE-E1	BAAE	BAAE-EF	B18-BAAE-E	2018	Average	1	0	0	1
B18-BAAE-E10	BAAE	BAAE-EF	B18-BAAE-E	2018	Average	0	0	1	1
B18-BAAE-E2	BAAE	BAAE-EF	B18-BAAE-E	2018	Average	0	0	1	1
B18-BAAE-E3	BAAE	BAAE-EF	B18-BAAE-E	2018	Average	0	0	1	1
B18-BAAE-E4	BAAE	BAAE-EF	B18-BAAE-E	2018	Average	0	0	0	0
B18-BAAE-E5	BAAE	BAAE-EF	B18-BAAE-E	2018	Average	1	0	0	0
B18-BAAE-E6	BAAE	BAAE-EF	B18-BAAE-E	2018	Average	1	0	0	1
B18-BAAE-E7	BAAE	BAAE-EF	B18-BAAE-E	2018	Average	0	0	1	1
B18-BAAE-E8	BAAE	BAAE-EF	B18-BAAE-E	2018	Average	1	0	0	0
B18-BAAE-E9	BAAE	BAAE-EF	B18-BAAE-E	2018	Average	1	0	0	0
B18-BAAE-F1	BAAE	BAAE-EF	B18-BAAE-F	2018	Best	1	0	0	0
B18-BAAE-F10	BAAE	BAAE-EF	B18-BAAE-F	2018	Best	0	0	0	0
B18-BAAE-F2	BAAE	BAAE-EF	B18-BAAE-F	2018	Best	0	0	0	0
B18-BAAE-F3	BAAE	BAAE-EF	B18-BAAE-F	2018	Best	0	0	1	1
B18-BAAE-F4	BAAE	BAAE-EF	B18-BAAE-F	2018	Best	1	0	0	0
B18-BAAE-F5	BAAE	BAAE-EF	B18-BAAE-F	2018	Best	0	0	0	0
B18-BAAE-F6	BAAE	BAAE-EF	B18-BAAE-F	2018	Best	0	0	0	0
B18-BAAE-F7	BAAE	BAAE-EF	B18-BAAE-F	2018	Best	0	0	0	0
B18-BAAE-F8	BAAE	BAAE-EF	B18-BAAE-F	2018	Best	0	0	0	0
B18-BAAE-F9	BAAE	BAAE-EF	B18-BAAE-F	2018	Best	0	0	0	0
B18-BAAA-B1	BAAA	BAAA	B18-BAAA-B	2018	Best	1	NA	NA	NA
B18-BAAA-B10	BAAA	BAAA	B18-BAAA-B	2018	Best	1	NA	NA	NA
B18-BAAA-B2	BAAA	BAAA	B18-BAAA-B	2018	Best	1	NA	NA	NA
B18-BAAA-B3	BAAA	BAAA	B18-BAAA-B	2018	Best	1	NA	NA	NA
B18-BAAA-B4	BAAA	BAAA	B18-BAAA-B	2018	Best	1	NA	NA	NA
B18-BAAA-B5	BAAA	BAAA	B18-BAAA-B	2018	Best	1	NA	NA	NA
B18-BAAA-B6	BAAA	BAAA	B18-BAAA-B	2018	Best	1	NA	NA	NA
B18-BAAA-B7	BAAA	BAAA	B18-BAAA-B	2018	Best	1	NA	NA	NA
B18-BAAA-B8	BAAA	BAAA	B18-BAAA-B	2018	Best	1	NA	NA	NA
B18-BAAA-B9	BAAA	BAAA	B18-BAAA-B	2018	Best	0	NA	NA	NA
B18-BAAA-C1	BAAA	BAAA	B18-BAAA-C	2018	Average	1	NA	NA	NA
B18-BAAA-C10	BAAA	BAAA	B18-BAAA-C	2018	Average	1	NA	NA	NA
B18-BAAA-C2	BAAA	BAAA	B18-BAAA-C	2018	Average	1	NA	NA	NA
B18-BAAA-C3	BAAA	BAAA	B18-BAAA-C	2018	Average	1	NA	NA	NA
B18-BAAA-C4	BAAA	BAAA	B18-BAAA-C	2018	Average	1	NA	NA	NA
B18-BAAA-C5	BAAA	BAAA	B18-BAAA-C	2018	Average	1	NA	NA	NA
B18-BAAA-C6	BAAA	BAAA	B18-BAAA-C	2018	Average	1	NA	NA	NA
B18-BAAA-C7	BAAA	BAAA	B18-BAAA-C	2018	Average	1	NA	NA	NA
B18-BAAA-C8	BAAA	BAAA	B18-BAAA-C	2018	Average	1	NA	NA	NA
B18-BAAA-C9	BAAA	BAAA	B18-BAAA-C	2018	Average	0	NA	NA	NA
